# Supplementary material for: Strain and Spin-Orbit Coupling Engineering in Twisted WS2/Graphene Heterobilayer
Source: MDPI journal article supplement (doi:10.3390/nano11112921), 2021-10-31
Supplement: s1 [file s1]

Supplementary Information:

# Strain and Spin-Orbit Coupling Engineering in Twisted WS<sub>2</sub>/Graphene Heterobilayer

Cyrine Ernandes <sup>1</sup>, Lama Khalil <sup>1</sup>, Hugo Henck <sup>1</sup>, Meng-Qiang Zhao <sup>2</sup>, Julien Chaste <sup>1</sup>, Fabrice Oehler <sup>1</sup>, Alan T. Charlie Johnson <sup>3</sup>, Maria C. Asensio <sup>4,5</sup>, Debora Pierucci <sup>1</sup>, Marco Pala <sup>1</sup>, José Avila <sup>6,\*</sup> and Abdelkarim Ouerghi <sup>1,\*</sup>

<sup>1</sup> Centre de Nanosciences et de Nanotechnologies, CNRS, Université Paris-Saclay, 91120 Palaiseau, France; cyrine.ernandes@universite-paris-saclay.fr (C.E.); lama.khalil@universite-paris-saclay.fr (L.K.); hugo.henck@gmail.com (H.H.); julien.chaste@c2n.upsaclay.fr (J.C.); fabrice.oehler@c2n.upsaclay.fr (F.O.); debora.pierucci@c2n.upsaclay.fr (D.P.); marco.pala@c2n.upsaclay.fr (M.P.)

<sup>2</sup> Department of Chemical and Materials Engineering, New Jersey Institute of Technology, 138 Warren Street, Newark, NJ 07103, USA; mz24@njit.edu

<sup>3</sup> Department of Physics and Astronomy, University of Pennsylvania, 209S 33rd Street, Philadelphia, PA 19104, USA; cjohnson@physics.upenn.edu

<sup>4</sup> Materials Science Institute of Madrid (ICMM), Spanish Scientific Research Council (CSIC), Cantoblanco, 28049 Madrid, Spain; mc.asensio@csic.es

<sup>5</sup> MATINEE: CSIC Research Associated Unit between the Institute of Materials Science of the Valencia University (ICMUV) and the ICMM, Cantoblanco, 28049 Madrid, Spain

<sup>6</sup> Synchrotron-SOLEIL, Université Paris-Saclay, Saint-Aubin, BP48, 91192 Gif sur Yvette, France

\* Correspondence: jose.avila@synchrotron-soleil.fr (J.A.); abdelkarim.ouerghi@c2n.upsaclay.fr (A.O.)

**Growth of WS<sub>2</sub>/SiO<sub>2</sub>/Si(001):** WS<sub>2</sub>/SiO<sub>2</sub> samples were grown by chemical vapor deposition (CVD) in a 1'' quartz tube furnace. The growth substrate (SiO<sub>2</sub>/Si(001)) was placed in the center of the furnace and heated to 800 °C. A 25 mg sulfur pellet was placed on a piece of silicon and positioned upstream in the furnace such that its temperature was approximately 150 °C. Carrier gas (500 sccm N<sub>2</sub> and 15 sccm H<sub>2</sub>) was used to bring sulfur vapor into the furnace for a 30 min growth period. A PMMA assisted method was employed to transfer the CVD grown WS<sub>2</sub> on epitaxial monolayer graphene on SiC. Typical single-crystal domains with an equilateral triangle shape were obtained by the CVD growth procedure. The WS<sub>2</sub> domains transferred onto the graphene retain their triangular shapes with lateral sizes of ~20 to ~200 nm. To further clean the surface and interface of the WS<sub>2</sub>/graphene, we annealed the samples at 350 °C for 120 min in UHV (base pressure below P ~ 10<sup>-10</sup> mbar).

**Band structure of WS<sub>2</sub>/graphene heterostructure:** The nanoARPES measurements (spot size about 600 nm) were conducted at the Antares beamline of Synchrotron SOLEIL (Saint-Aubin, France). We used linearly polarized photons of 100 eV and a hemispherical electron analyzer with vertical slits to allow band mapping. All ARPES experiments were done at low temperature (70 K).

**DFT calculations:** Band structures calculations were realized with the QUANTUM ESPRESSO code [35]. We adopted fully relativistic pseudopotentials and performed non-collinear simulations to include the spin-orbit interaction. For the exchange-correlation term we considered both the PBE and the HSE hybrid functional [36] to better estimate the band-gap energy. The self-consistent solution was obtained by adopting a 10×15×1 Monkhorst-Pack grid and a cutoff energy of 50 Ry. A vacuum space of 20 Å along the vertical direction was used to minimize the interaction between two adjacent sheets. Cell parameters and atomic positions were relaxed according to a convergence threshold for forces and energy of 10<sup>-3</sup> and 10<sup>-4</sup> (a.u.), respectively.

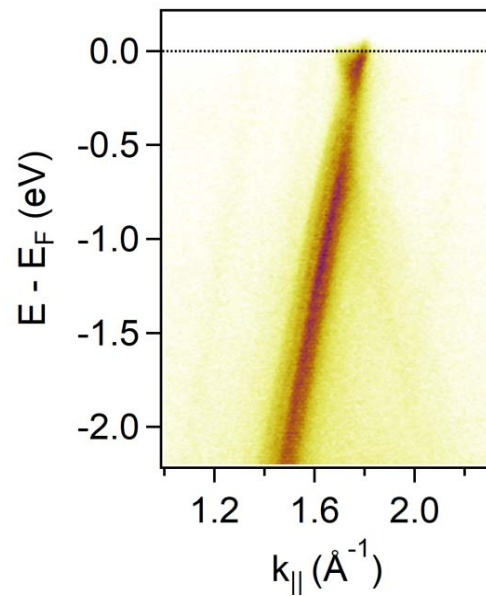

**Figure S1.** Typical Band structure of graphene layer on SiC(0001) (inside and outside of the WS<sub>2</sub>).

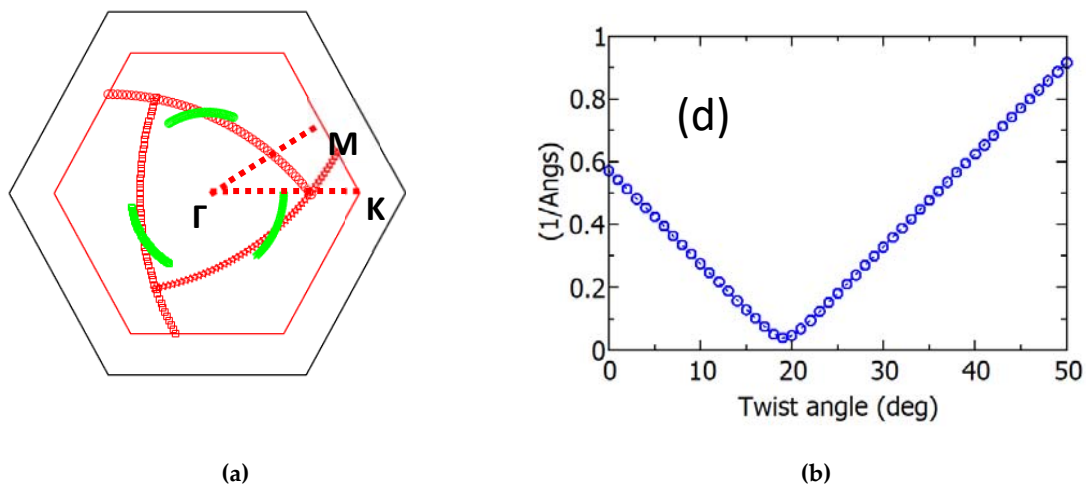

**Figure S2.** (a) Band-structure calculations of the monolayer WS<sub>2</sub> along the high symmetry points of the Brillouin zone for different stress levels. (b) The evolution of the three wavevectors  $k_1^\theta$ ,  $k_2^\theta$  and  $k_3^\theta$  as a function of the twist angle  $\theta$ . The hexagons represent the first Brillouin zone of (black) graphene, (red) WS<sub>2</sub> with  $\theta = 0^\circ$  and (magenta) WS<sub>2</sub> with  $\theta = 20^\circ$ . The green symbols represent the evolution of the Q points. (c) Distance between  $k_1^\theta$  and Q as a function of  $\theta$ .

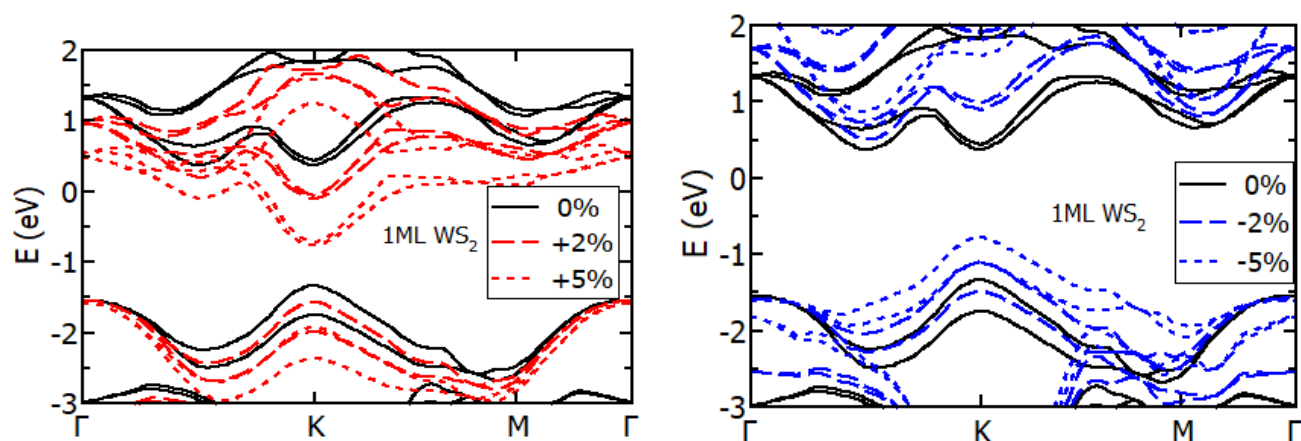

Figure S3. Evolution of the band-structure calculations of the monolayer  $\text{WS}_2$  under strain.

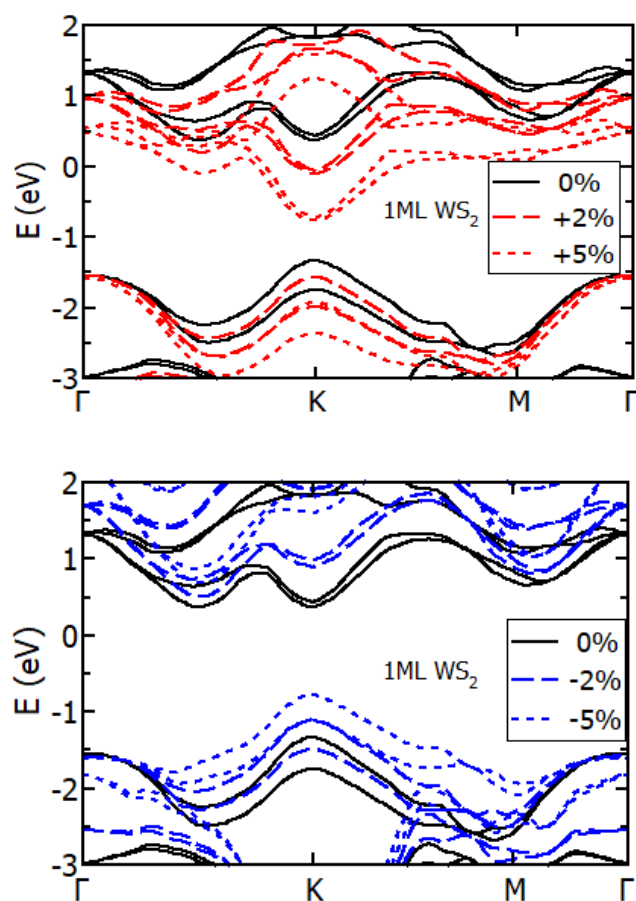

Figure S4. Evolution of the band-structure calculations of the monolayer  $\text{WS}_2$  under strain.
